# Supplementary material
Source: MDPI journal article supplement (https://www.mdpi.com/2306-5710/7/3/57)

Supplementary Materials

# The Effect of Dicarboxymethyl Cellulose on the Prevention of Protein Haze Formation on White Wine

Diana Gago <sup>1</sup>, Ricardo Chagas <sup>2</sup> and Luísa M. Ferreira <sup>1,\*</sup>

<sup>1</sup> LAQV-REQUIMTE, Departamento de Química, NOVA School of Science and Technology, Universidade NOVA de Lisboa, 2829-516 Caparica, Portugal; dx.gago@campus.fct.unl.pt

<sup>2</sup> Food4Sustainability-Associação Para a Inovação No Alimento Sustentável, Centro Empresarial de Idanha-a-Nova, Zona Industrial, 6060-182 Idanha-a-Nova, Portugal; ricardo.chagas@food4sustainability.org

\* Correspondence: lpf@fct.unl.pt

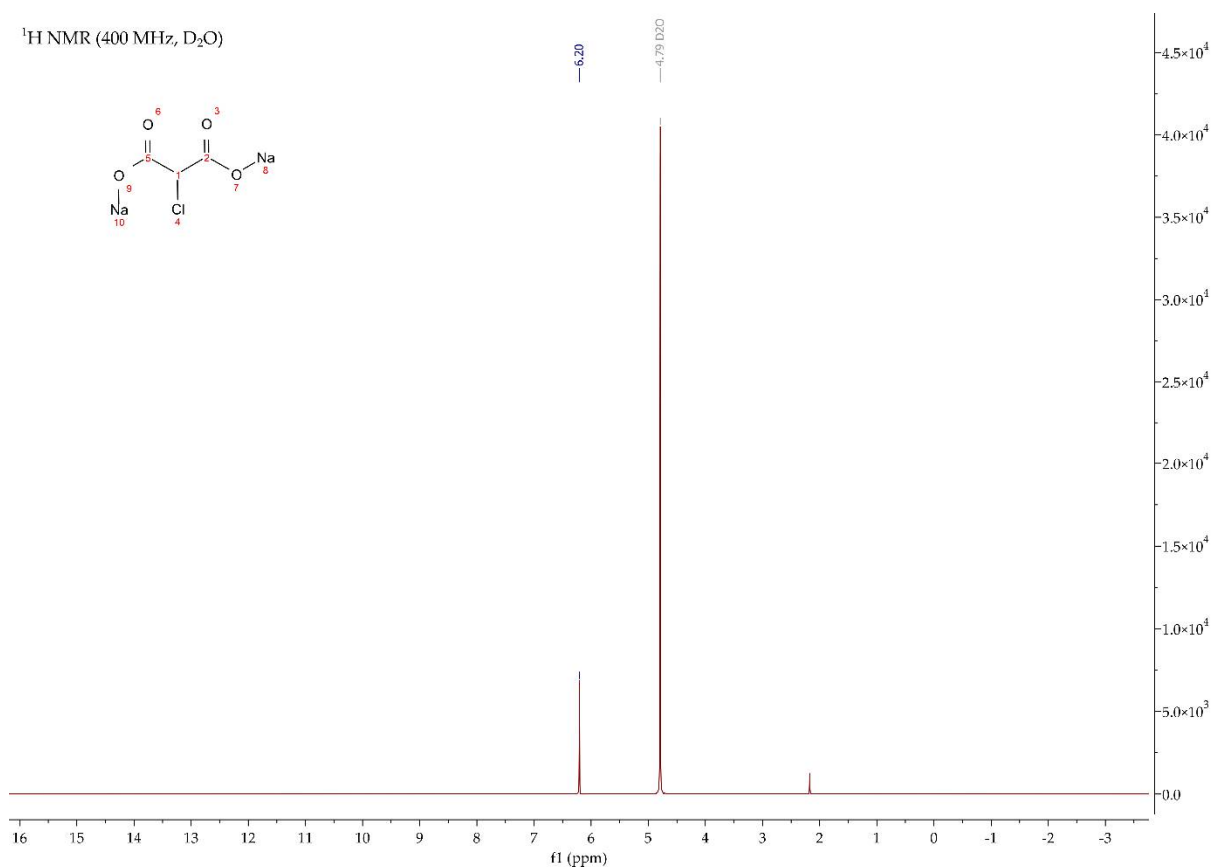

**Figure S1.** <sup>1</sup>H NMR (D<sub>2</sub>O, 400 MHz) spectrum of NaCMA.

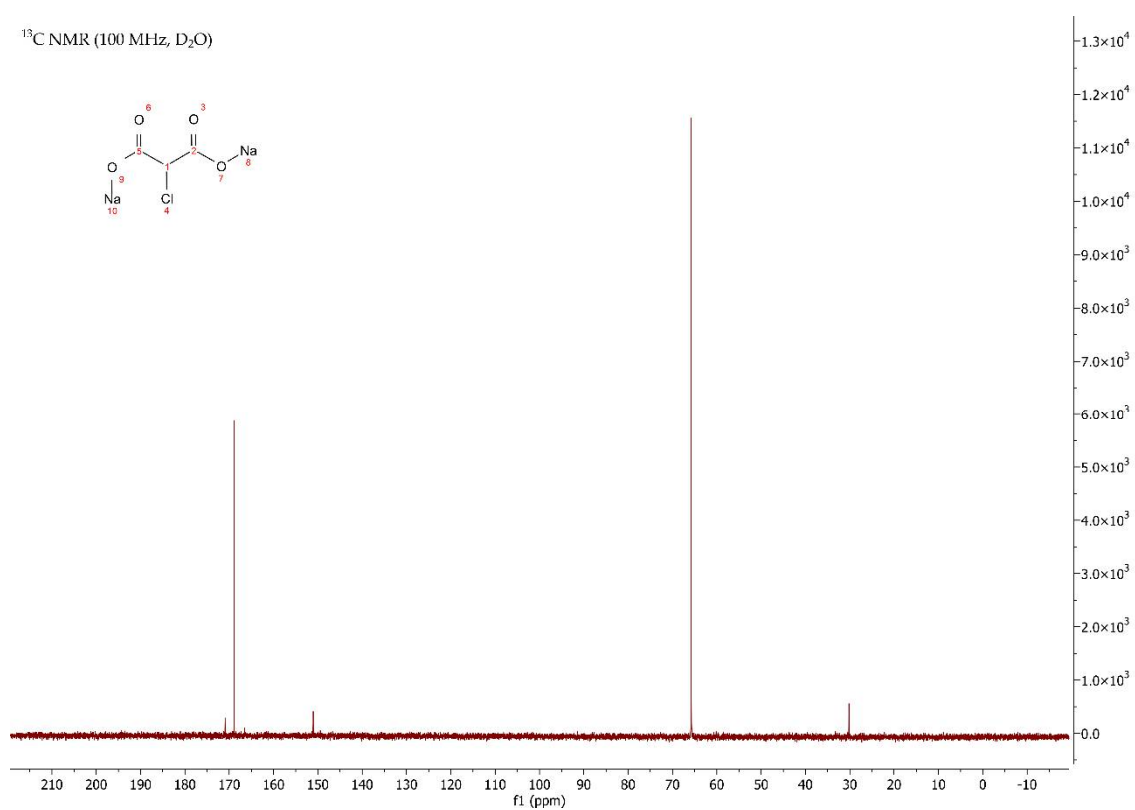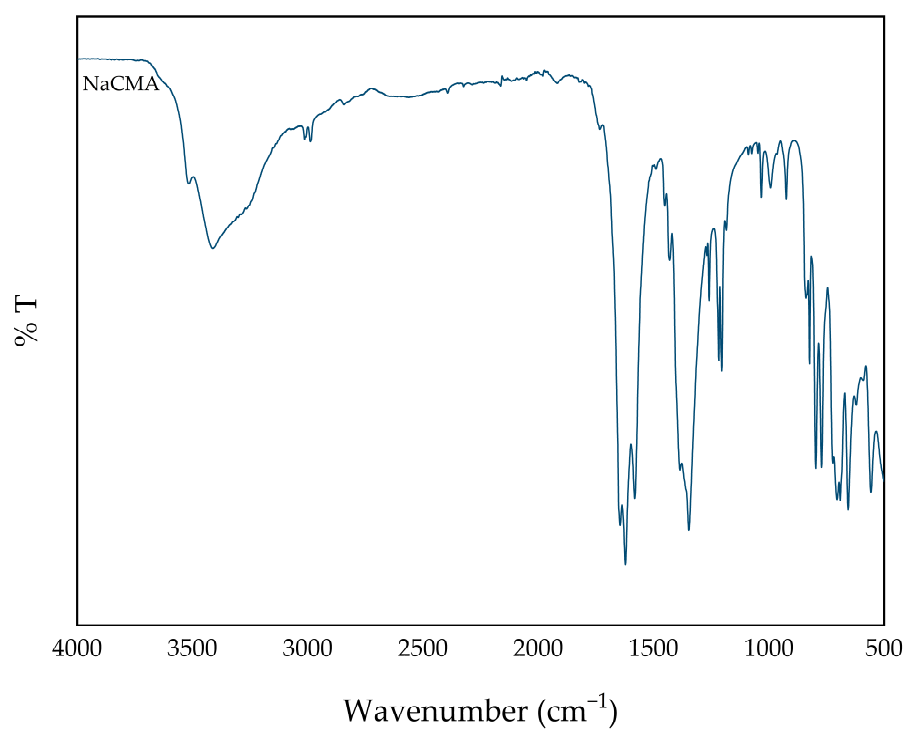

Supplement: s1 [file s1]
